# Supplementary material for: Development of a Green, Quick, and Efficient Method Based on Ultrasound-Assisted Extraction Followed by HPLC-DAD for the Analysis of Bioactive Glycoalkaloids in Potato Peel Waste
Source: MDPI journal article supplement (doi:10.3390/foods13050651), 2024-02-21
Supplement: s1 [file s1]

## Supplementary Materials

# Development of a Green, Quick, and Efficient Method Based on Ultrasound-Assisted Extraction Followed by HPLC-DAD for the Analysis of Bioactive Glycoalkaloids in Potato Peel Waste

Isabel Martínez-García <sup>1</sup>, Carlos Gaona-Scheytt <sup>1</sup>, Sonia Morante-Zarcero <sup>1,\*</sup> and Isabel Sierra <sup>1,2,\*</sup>

<sup>1</sup> Departamento de Tecnología Química y Ambiental, E.S.C.E.T, Universidad Rey Juan Carlos, C/Tulipán s/n, 28933 Móstoles, Spain; isabel.martinezg@urjc.es (I.M.-G.); cf.gaona.2019@alumnos.urjc.es (C.G.-S.)

<sup>2</sup> Instituto de Tecnologías para la Sostenibilidad, Universidad Rey Juan Carlos, C/ Tulipán s/n, 28933 Móstoles, Spain

\* Correspondence: sonia.morante@urjc.es (S.M.-Z.); isabel.sierra@urjc.es (I.S.)

**Table S1.** Potato peel varieties analyzed in this work and their specifications; \*data obtained from the product labels.

| Variety*             | Origin*  | Category* | Caliber (mm)* | Peel colour* | Use*                            | Moisture determined by freeze-drying (%) |
|----------------------|----------|-----------|---------------|--------------|---------------------------------|------------------------------------------|
| <b>Agata</b>         | France   | I         | 50/80         | Yellow       | Boiling                         | 83.15                                    |
| <b>Agria</b>         | Spain    | I         | 50/75         | Yellow       | Frying                          | 78.07                                    |
| <b>Amandine</b>      | France   | I         | 40/65         | Yellow       | All elaborations                | 82.03                                    |
| <b>Amarin</b>        | Spain    | I         | 50/80         | Yellow       | All elaborations                | 82.46                                    |
| <b>Caesar</b>        | France   | I         | 50/80         | Yellow       | Frying, puree                   | 84.33                                    |
| <b>Colomba</b>       | Spain    | I         | 28/45         | Yellow       | Special for garnish             | 81.80                                    |
| <b>Evolution</b>     | Portugal | I         | 50/80         | Red          | All elaborations                | 82.86                                    |
| <b>Frisia</b>        | Spain    | I         | 45/80         | Yellow       | All elaborations                | 83.66                                    |
| <b>Memphis</b>       | Spain    | I         | 50/80         | Red          | All elaborations                | 85.40                                    |
| <b>Monalisa</b>      | France   | I         | 50/80         | Yellow       | Frying, boiling                 | 80.55                                    |
| <b>Lady Amarilla</b> | Spain    | I         | 50/80         | Yellow       | Frying                          | 80.13                                    |
| <b>Rudolph</b>       | France   | I         | 50/80         | Red          | All elaborations                | 82.97                                    |
| <b>Soprano</b>       | Spain    | I         | 30/45         | Yellow       | Boiling, microwave              | 84.49                                    |
| <b>Universa</b>      | Spain    | I         | 45/+          | Yellow       | Frying, oven, boiling, barbecue | 79.95                                    |
| <b>Vivaldi</b>       | Spain    | I         | 45/80         | Yellow       | All elaborations                | 82.49                                    |

**Table S2.** Values obtained from ANOVA analysis.

|                                                                                                            | Mean square | F-value | p-value |
|------------------------------------------------------------------------------------------------------------|-------------|---------|---------|
| <b>TGAs</b>                                                                                                |             |         |         |
| A                                                                                                          | 63168.4     | 3.597   | 0.0597  |
| B                                                                                                          | 4.06734E6   | 231.631 | 0.0000* |
| C                                                                                                          | 152168      | 8.666   | 0.0123* |
| AB                                                                                                         | 96240.2     | 5.481   | 0.0096* |
| AC                                                                                                         | 66212.7     | 3.771   | 0.0536  |
| BC                                                                                                         | 105768      | 6.023   | 0.0154* |
| CC                                                                                                         | 661.5       | 0.038   | 0.8494  |
| <b>R<sup>2</sup> = 0.9775; R<sup>2</sup><sub>adj</sub> = 0.9512; R<sup>2</sup><sub>pred</sub> = 0.8717</b> |             |         |         |
| <b>α-solanine</b>                                                                                          |             |         |         |
| A                                                                                                          | 19856.3     | 1.270   | 0.3162  |
| B                                                                                                          | 827242      | 52.883  | 0.0000* |
| C                                                                                                          | 51627.6     | 3.300   | 0.0943  |
| AB                                                                                                         | 26981.4     | 1.725   | 0.2090  |
| AC                                                                                                         | 68203.7     | 4.360   | 0.0377* |
| BC                                                                                                         | 37206.7     | 2.379   | 0.1349  |
| CC                                                                                                         | 36296.3     | 2.320   | 0.1563  |
| <b>R<sup>2</sup> = 0.9180; R<sup>2</sup><sub>adj</sub> = 0.8223; R<sup>2</sup><sub>pred</sub> = 0.5643</b> |             |         |         |
| <b>α-chaconine</b>                                                                                         |             |         |         |
| A                                                                                                          | 47084.1     | 14.905  | 0.0006* |
| B                                                                                                          | 1.21788E6   | 385.531 | 0.0000* |
| C                                                                                                          | 26526.7     | 8.397   | 0.0134* |
| AB                                                                                                         | 26760.4     | 8.471   | 0.0017* |
| AC                                                                                                         | 670.056     | 0.212   | 0.8118  |
| BC                                                                                                         | 17523.4     | 5.547   | 0.0197* |
| CC                                                                                                         | 23688.2     | 7.499   | 0.0180* |
| <b>R<sup>2</sup> = 0.9863; R<sup>2</sup><sub>adj</sub> = 0.9703; R<sup>2</sup><sub>pred</sub> = 0.9165</b> |             |         |         |

\*Significant at p≤0.05
